# Supplementary material for: Goat milk derived small extracellular vesicles ameliorate LPS-induced intestinal epithelial barrier dysfunction, oxidative stress, and apoptosis by inhibiting the MAPK signaling pathway
Source: Royal Society of Chemistry journal article supplement (doi:10.1039/d4fo04067h), 2024-01-01
Supplement: d4fo04067h1.pdf [file d4fo04067h1.pdf]

**Goat milk derived small extracellular vesicles ameliorate  
LPS-induced intestinal epithelial barrier dysfunction,  
oxidative stress, and apoptosis by inhibiting the MAPK  
signaling pathway**

**Feng Gao<sup>a, b</sup>, Xin Zhang<sup>a, b</sup>, Zhiming Xu<sup>a, b</sup>, Kang Zhang<sup>a, b</sup>, Fusheng Quan<sup>a, b, \*</sup>**

<sup>a</sup> College of Veterinary Medicine, Northwest A&F University, Yangling, 712100, China.

<sup>b</sup> Key Laboratory of Animal Biotechnology of the Ministry of Agriculture and Rural Affairs,  
College of Veterinary Medicine, Northwest A&F University, Yangling, 712100, China

**Supplementary Material**

---

\* Corresponding authors at: College of Veterinary Medicine, Northwest A&F University, Key Laboratory of Animal Biotechnology of the Ministry of Agriculture and Rural Affairs, Yangling, 712100, China.

E-mail address: quanfusheng@nwsuaf.edu.cn (F. Quan)

**Table S1** Primer sequences for RT-qPCR.

| Genes     | Forward primer         | Reverse primer          |
|-----------|------------------------|-------------------------|
| ZO-1      | GAAGCTGGATTCCTAAGACCTG | CCTCCCTTGCTAACTTTTCTCTG |
| Claudin-1 | TCGACTCCTTGCTGAATCTG   | GGACACAAAGATTGCGATCAG   |
| Occludin  | AAAGCAGGGAAGGCGAAG     | TGTTGATCTGAAGTGATAGGTGG |
| SOD1      | GGTGAACCAGTTGTGTTGTC   | CCGTCCTTTCCAGCAGTC      |
| GPX4      | ATACGCTGAGTGTGGTTTGC   | CTTCATCCACTTCCACAGCG    |
| NOX1      | AATCCAGCGTGACACAAC     | GACGTCAGTGGCTCTGTCAA    |
| Mapk7     | ACACGACAACATCATCGCCA   | TCCAGGACCACGTAGACAGA    |
| Mapk14    | CCCGAGCGATACCAGAACCT   | TGGCGTGAATGATGGACTGA    |
| Mapk15    | TGTTTGAGTCCATGGACACC   | GCATCCAATAGAACGTTGGC    |
| Tgfbr3    | CTCCAGGCCACTTTCGCT     | TTTCATGGGGTTGACTGGGC    |
| Raf1      | GGGACTCCACTGCACTTGC    | ACGATCAGCAATGGTTTCGG    |
| Srf       | GGCCGCGTGAAGATCAAGAT   | CACATGGCCTGTCTCACTGG    |
| GAPDH     | TGAAGCAGGCATCTGAGGG    | CGAAGGTGGAAGAGTGGGAG    |

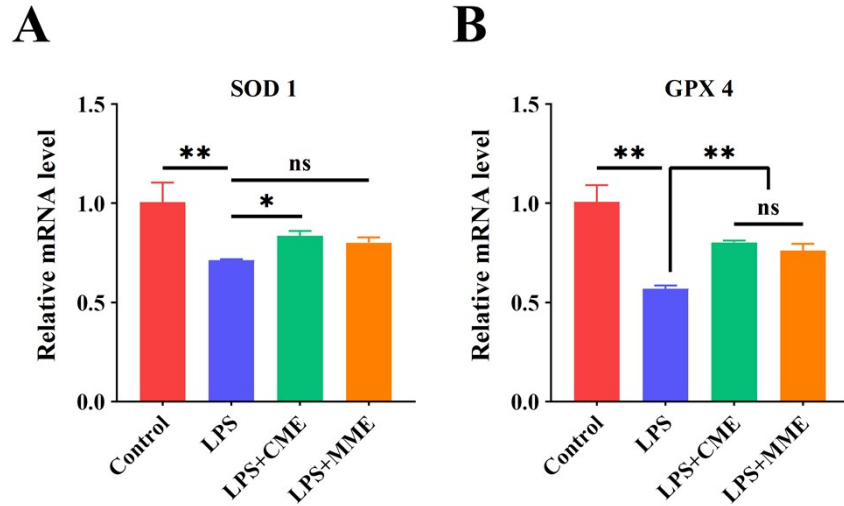

**Fig. S1** Effects of CME and MME on LPS-induced oxidative stress in IEC-6. (A) mRNA expression of SOD 1 in IEC-6. (C) mRNA expression of GPX 4 in IEC-6. \*,  $P < 0.05$ ; \*\*,  $P < 0.01$ .

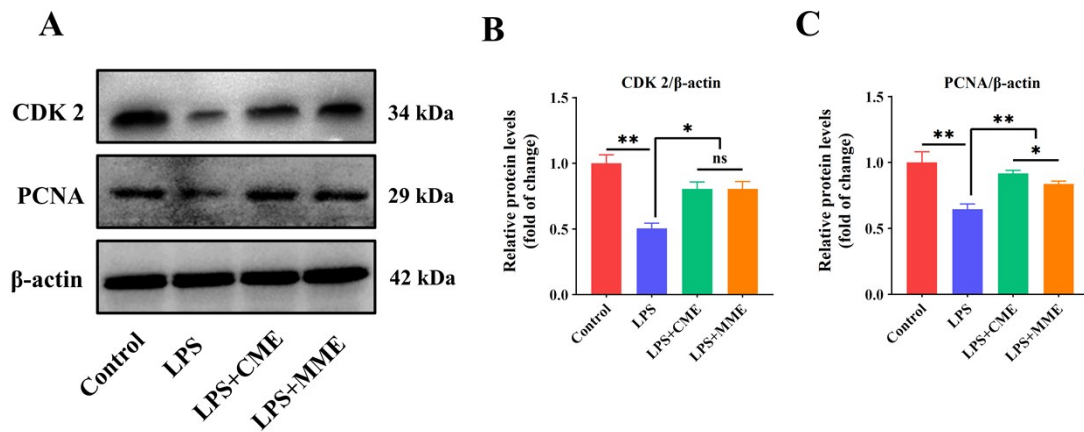

**Fig. S2** Effects of CME and MME on LPS-induced proliferation of IEC-6. (A) Western blot analysis of protein expression levels of CDK 2 and PCNA in IEC-6. (G-I) Quantitative analysis of CDK 2 and PCNA protein bands using Image J. \*,  $P < 0.05$ ; \*\*,  $P < 0.01$ .
